# Supplementary material for: ATM-deficiency-induced microglial activation promotes neurodegeneration in ataxia-telangiectasia
Source: PubMed Central journal article supplement — Cell Rep. Author manuscript; Available in PMC 2024 Mar 2. (PMC10908398; doi:10.1016/j.celrep.2023.113622), 2023-12-29
Supplement: NIHMS1961502-supplement-1.pdf [file NIHMS1961502-supplement-1.pdf]

**Cell Reports, Volume 43**

**Supplemental information**

**ATM-deficiency-induced microglial activation  
promotes neurodegeneration  
in ataxia-telangiectasia**

**Jenny Lai, Didem Demirbas, Junho Kim, Ailsa M. Jeffries, Allie Tolles, Junseok Park, Thomas W. Chittenden, Patrick G. Buckley, Timothy W. Yu, Michael A. Lodato, and Eunjung Alice Lee**

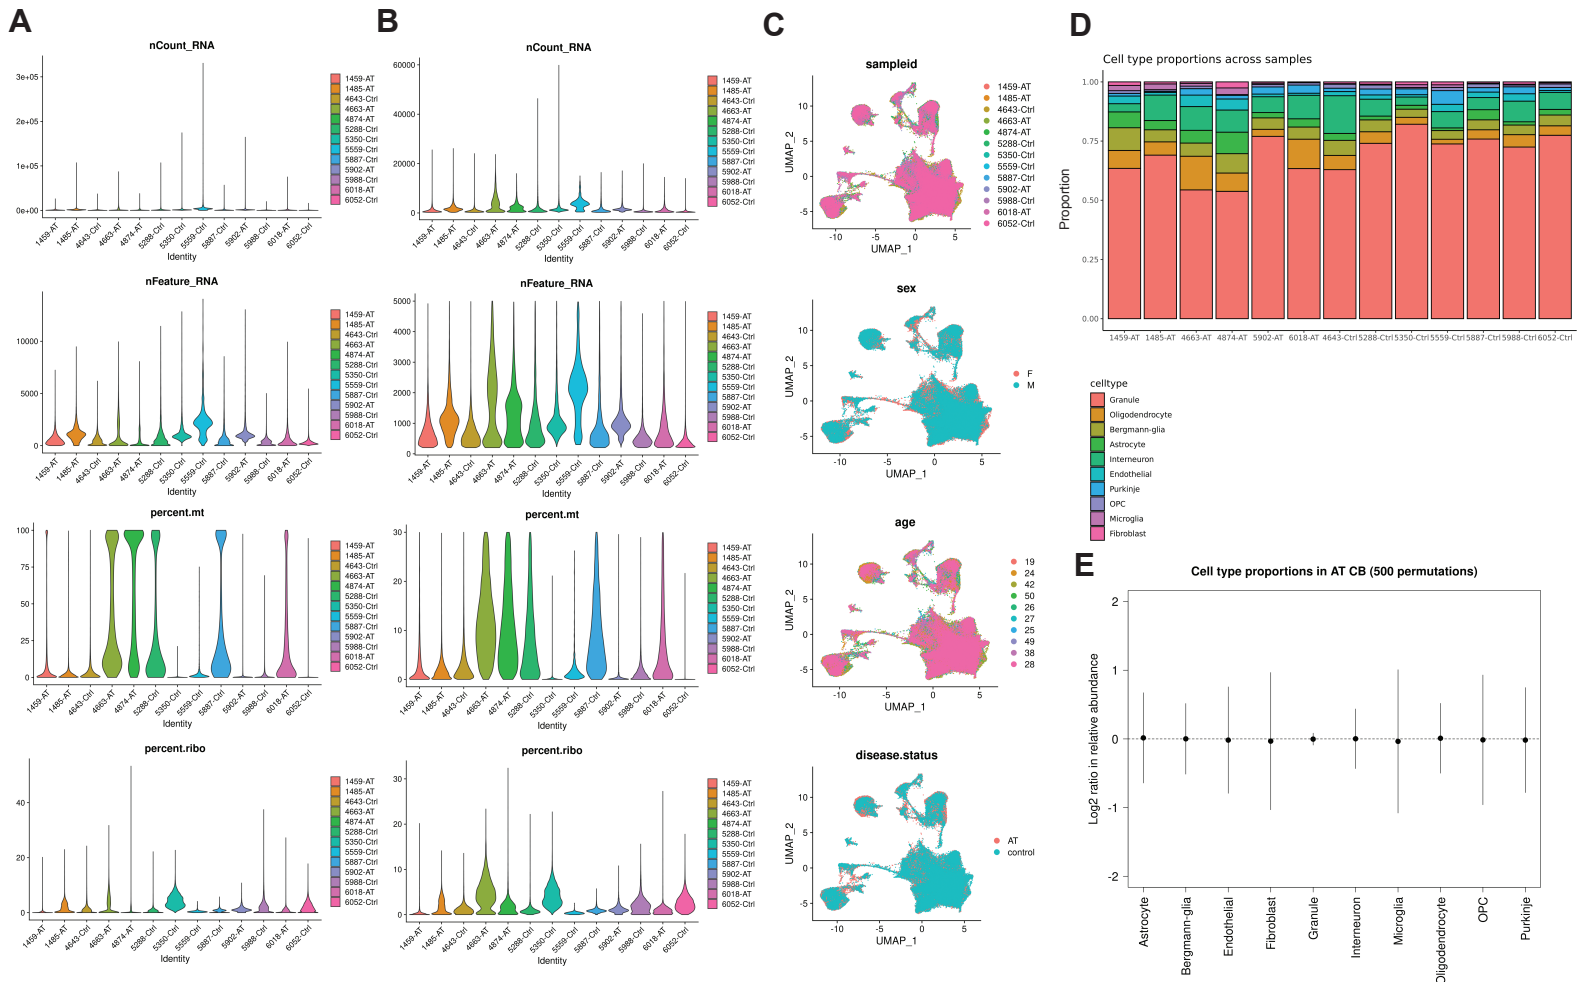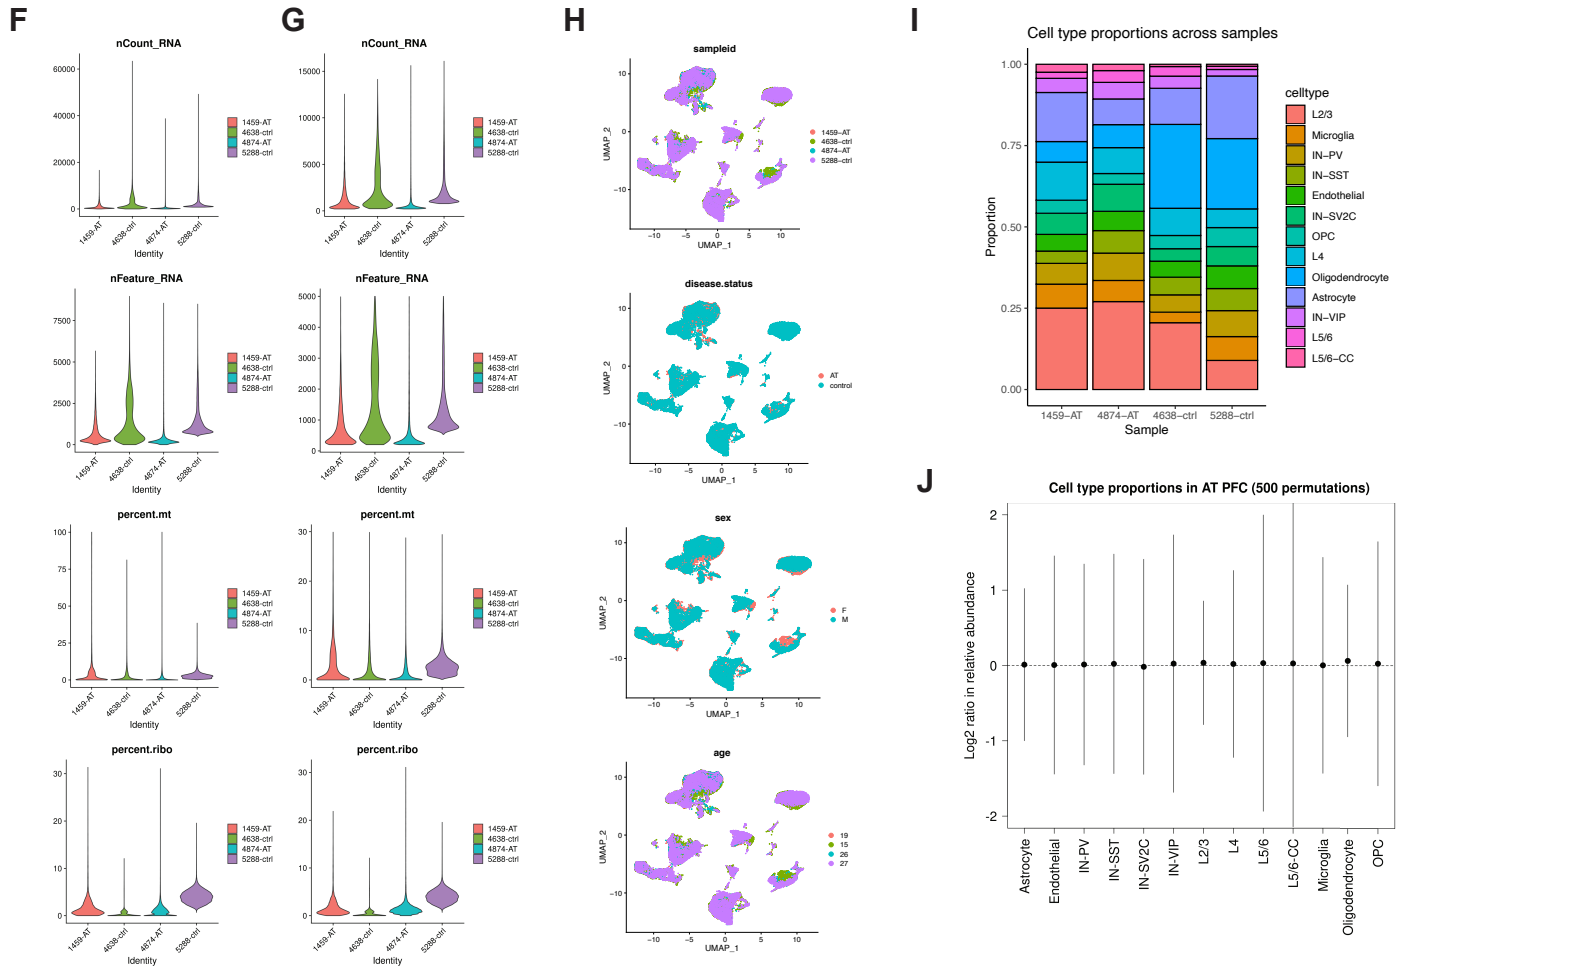

Fig. S1. Quality control information for snRNA-seq data from cerebellum and PFC, Related to Figure 1 and Figure 2. A. Transcript (nCount\_RNA), gene (nFeature\_RNA), percent transcripts from mitochondrial genes, and percent transcripts from ribosomal genes per cerebellar sample before quality control filtering. B. Transcript (nCount\_RNA), gene (nFeature\_RNA), percent transcripts from mitochondrial genes, and percent transcripts from ribosomal genes per cerebellar sample after quality control filtering. C. UMAP plots of cerebellar data showing integration of samples, sex, age, and disease status. D. Stacked barplots showing proportion of each cell type per cerebellar sample. E. Posterior distribution of log<sub>2</sub> ratio of cell type proportions in A-T cerebellum after 500 random permutations. F. Transcript (nCount\_RNA), gene (nFeature\_RNA), percent transcripts from mitochondrial genes, and percent transcripts from ribosomal genes per PFC sample before quality control filtering. G. Transcript (nCount\_RNA), gene (nFeature\_RNA), percent transcripts from mitochondrial genes, and percent transcripts from ribosomal genes per PFC sample after quality control filtering. H. UMAP plots of cerebellar data showing integration of samples, disease status, sex, and age. I. Stacked barplots showing proportion of each cell type per PFC sample. J. Posterior distribution of log<sub>2</sub> ratio of cell type proportions in A-T PFC after 500 random permutations.

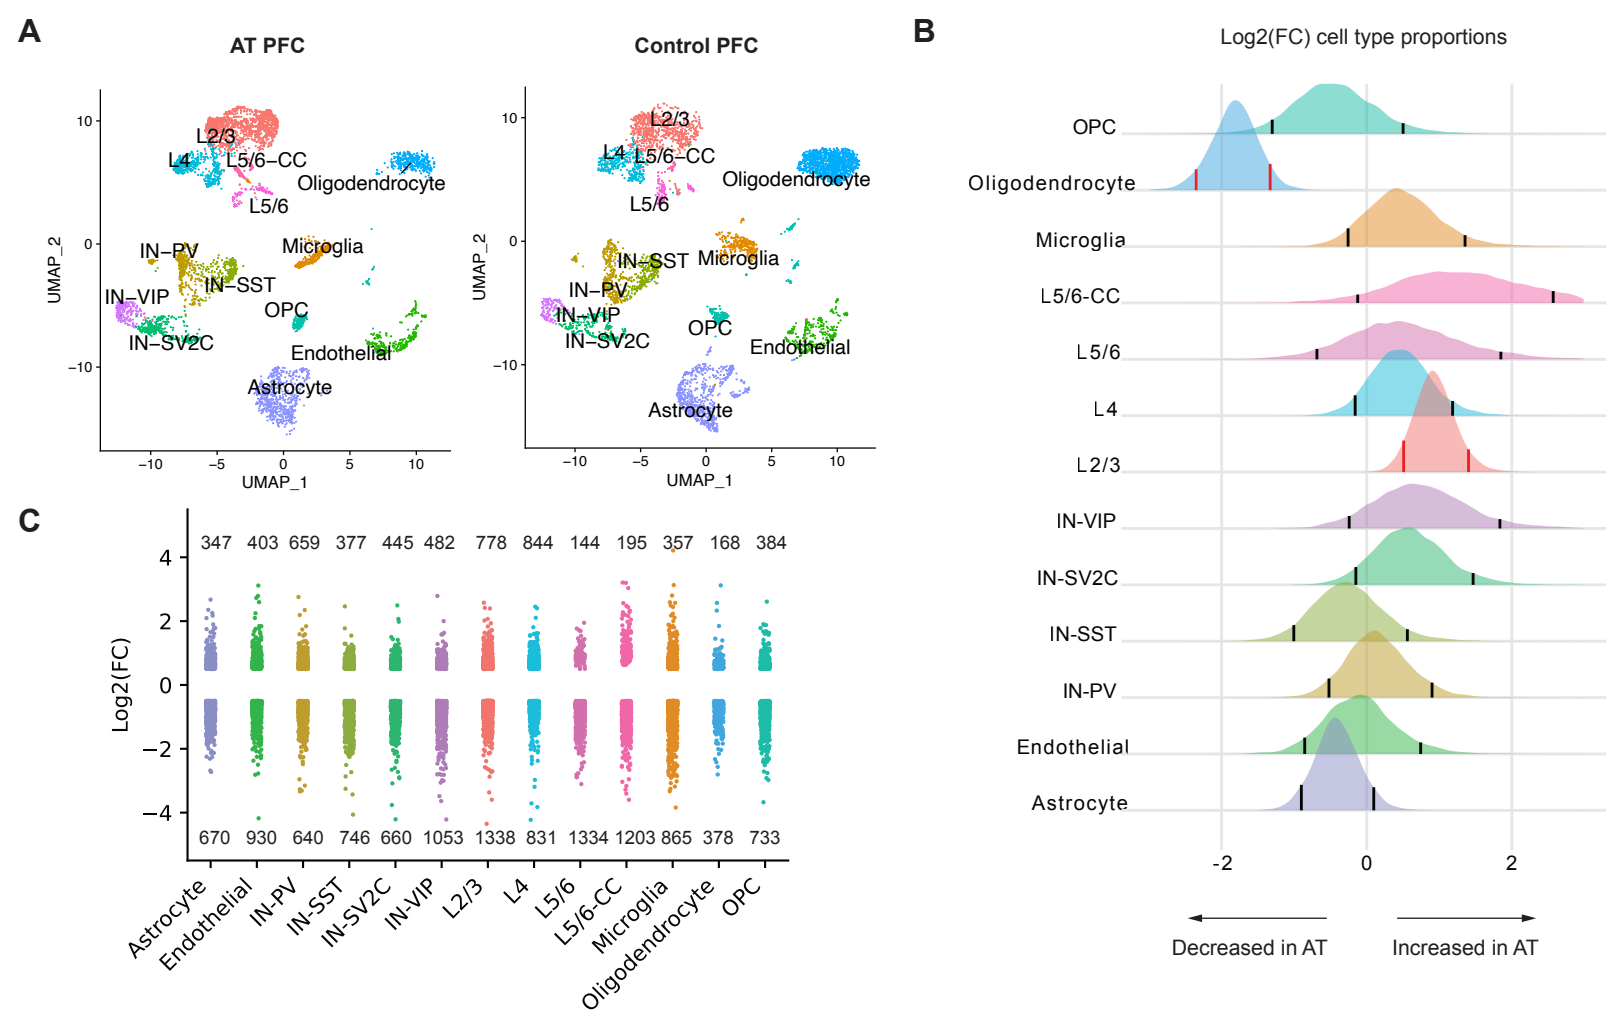

Fig. S2. snRNA-seq data of A-T PFC, Related to Figure 1. A. UMAP plot of major cell types in AT and control human PFC, downsampled to 10,000 cells per condition only for visualization purpose. B. Relative abundance of cell types in AT versus control PFC, shown as the posterior distribution of  $\text{Log}_2(\text{proportion in AT}/\text{proportion in control})$  with 89% credible interval. Red bars highlight credible intervals that do not overlap 0. Bolded cell type labels indicate a significant difference in relative abundance. C. Differentially expressed genes (DEGs) in each cell type with  $\text{FDR} < 0.05$ ,  $|\text{Log}_2\text{FoldChange}| > 0.50$ . Each dot represents a significantly differentially expressed gene.

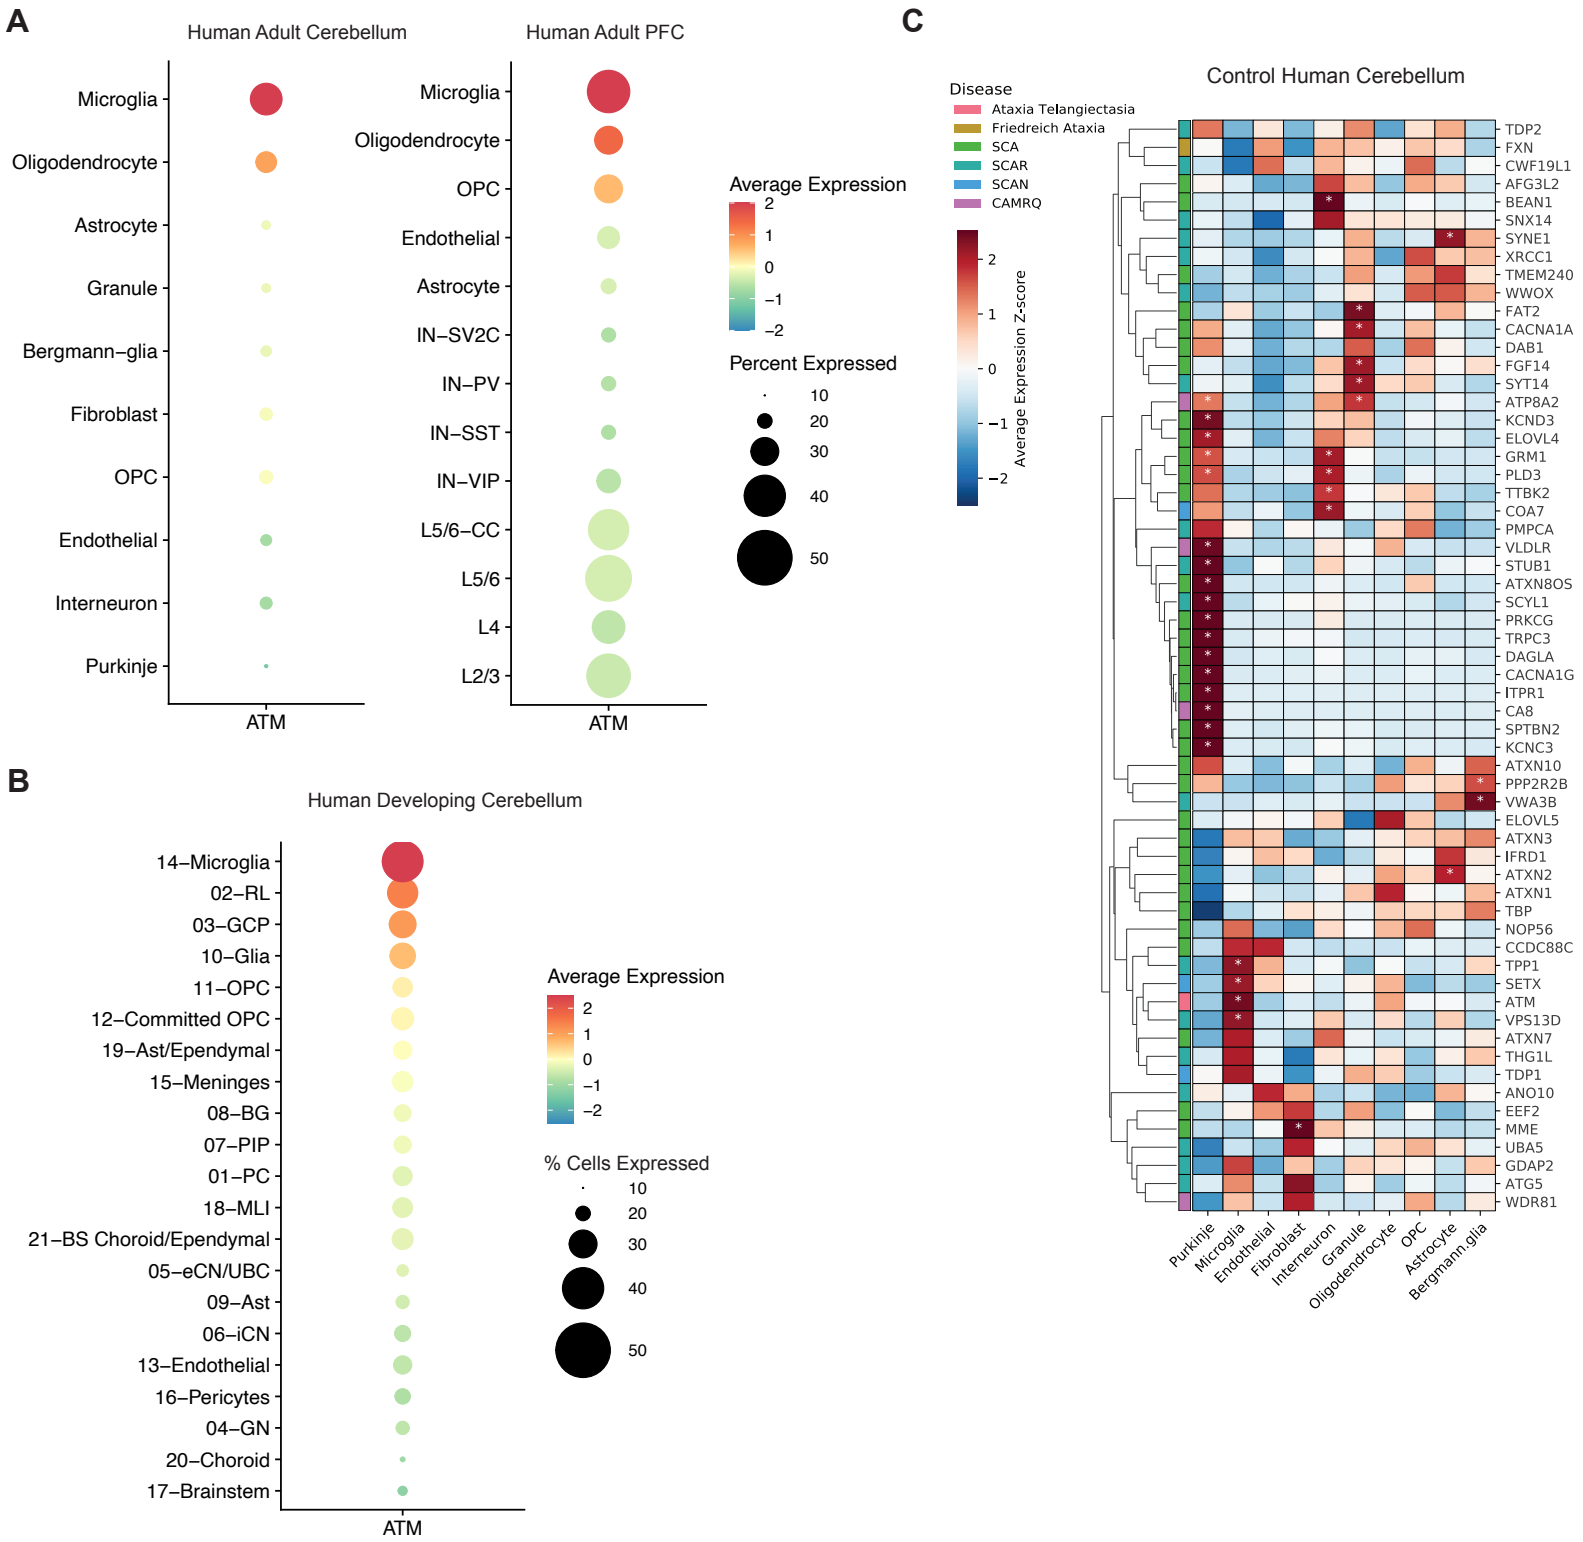

Fig. S3. Enriched expression of monogenic cerebellar disease genes in specific cell types, Related to Figure 2. A. Dotplot of average scaled expression of ATM in cell types of the adult human cerebellum and prefrontal cortex, and B. developing human cerebellum (Aldinger et al., 2021). Microglia have the highest expression of ATM out of all cell types in the cerebellum and PFC. Size of dot represents percentage of single cells expressing the gene. Expression scaled to mean of 0 and standard deviation of 1. C. Heatmap of cerebellar ataxia disease gene expression across cell types in control human cerebellum. Color represents centered and scaled log-normalized expression. \*Enrichment p-value <0.05. OPC: oligodendrocyte precursor cell, IN-SV2C: SV2C expressing inhibitory neuron; IN-PV: PVALB expressing inhibitory neuron; IN-SST: SST expressing inhibitory neuron; L5/6-CC: layer 5/6 cortico-cortical neuron; L5/6: layer 5/6 neuron; L4: layer 4 neuron; L2/3: layer 2/3 neuron; 01-PC: Purkinje cells; 02-RL: Rhombic lip; 03-GCP: Granule cell progenitors; 04-GN: Granule neurons; 05-eCN/UBC: Excitatory cerebellar nuclei neurons/ Unipolar brush cells; 06-iCN: Inhibitory cerebellar nuclei neurons; 07-PIP: PAX2+ interneuron progenitors; 08-BG: Bergmann glia; 09-Ast: Astrocytes; 10-Glia: Glia; 11-OPC: Oligodendrocyte precursor cells; 12-Committed OPC: Committed oligodendrocyte precursor cells; 13-Endothelial: Endothelial cells; 14-Microglia: Microglia; 15-Meninges: Meninges; 16-Pericytes: Pericytes; 17-Brainstem: Brainstem; 18-MLI: Molecular layer interneurons; 19-Ast/Ependymal: Astrocytes/ependymal cells; 20-Choroid: Choroid plexus; 21-BS Choroid/Ependymal: Choroid plexus/ependymal cell; SCA: spinocerebellar ataxia; SCAR: spinocerebellar ataxia, recessive; SCAN: spinocerebellar ataxia, autosomal recessive, with axonal neuropathy; CAMRQ: cerebellar ataxia, impaired intellectual development, and dysequilibrium syndrome.

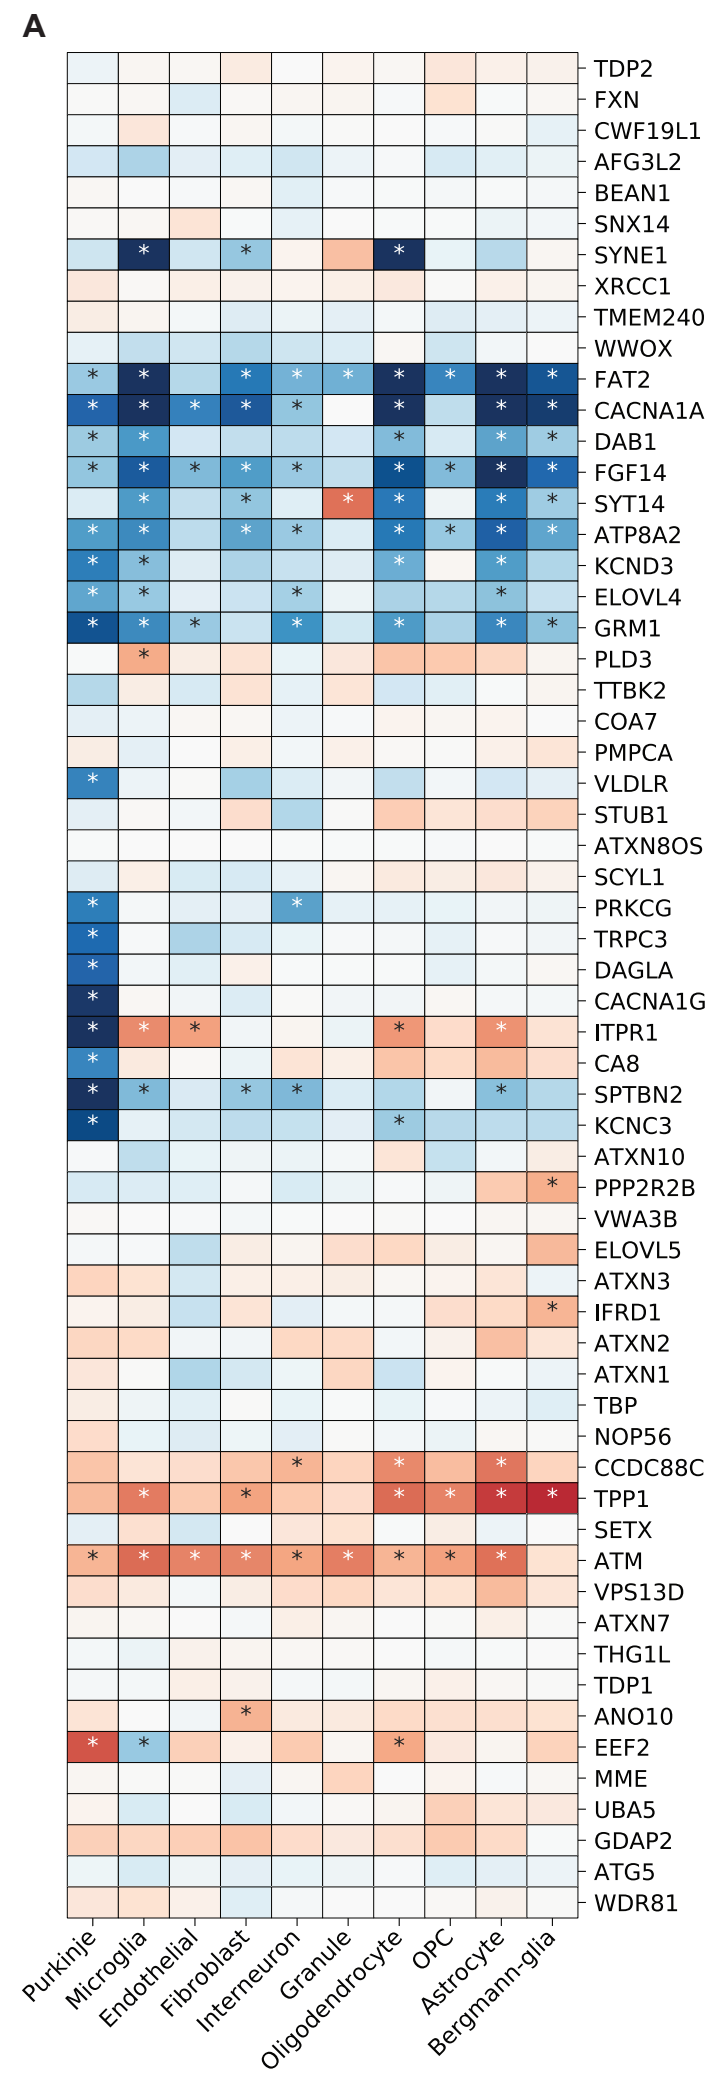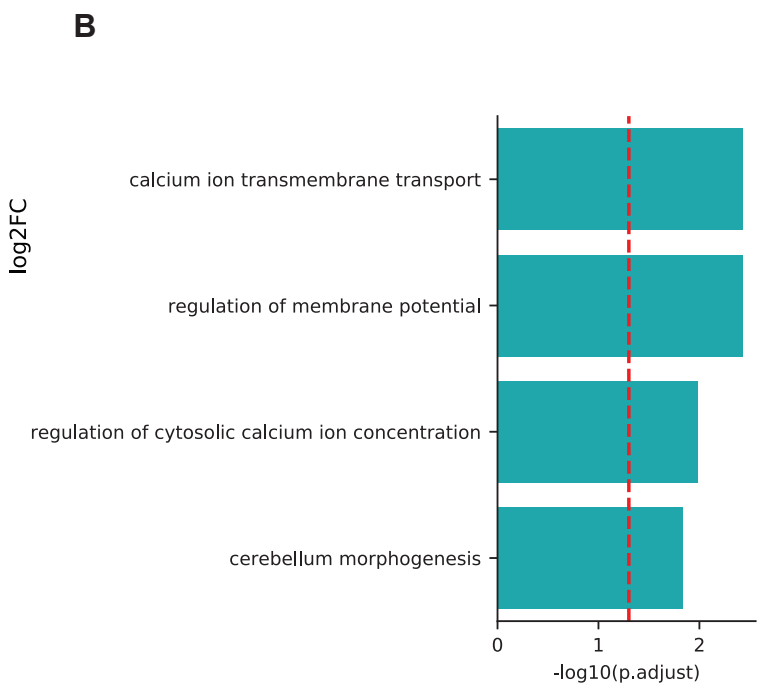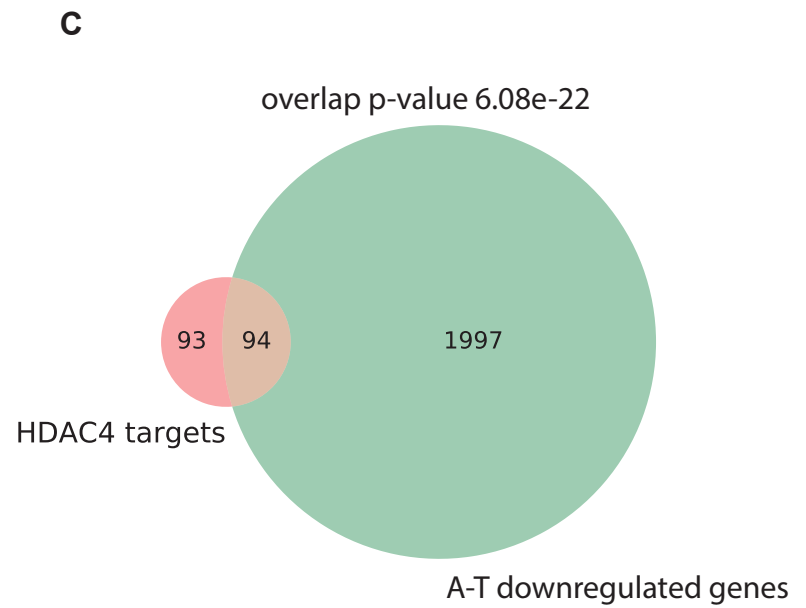

Fig. S4. Dysregulation of hereditary ataxia genes in A-T, Related to Figure 3. A. Heatmap showing log<sub>2</sub> fold-change of hereditary ataxia genes in A-T cerebellum. \*FDR<0.05. ATM expression increased in several cell types in A-T cerebellum, suggesting that lack of ATM function induces compensatory increases in transcription of the ATM locus. B. Enriched Gene Ontology (GO) pathways among disease genes with enriched expression in Purkinje cells and downregulated in A-T Purkinje cells. C. Overlap between HDAC4 neuronal target genes and downregulated DEGs in A-T cerebellum.

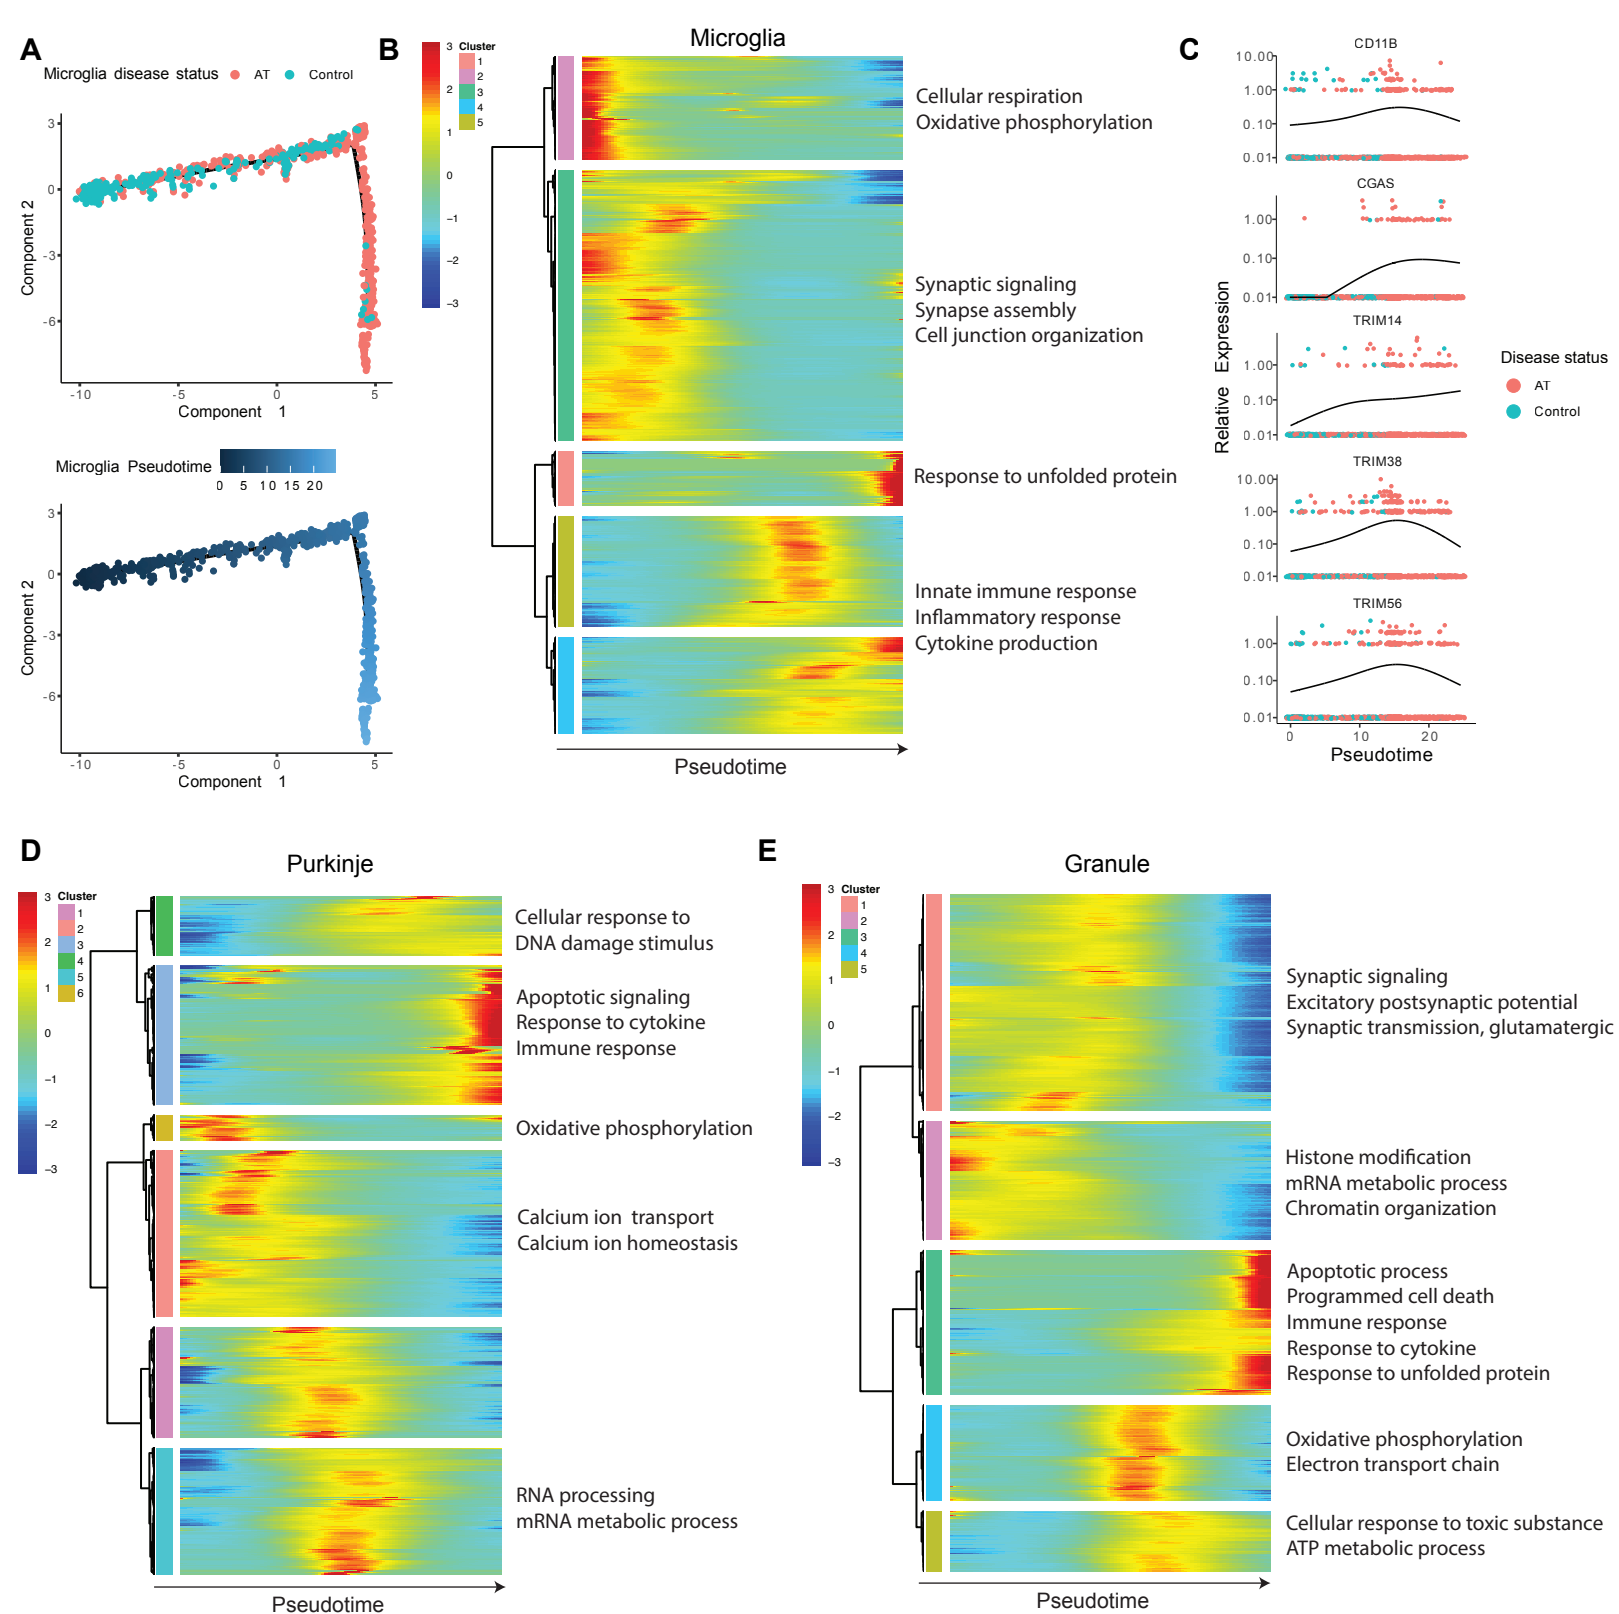

Fig. S5. Pseudotime analysis of disease progression reveals early microglia activation, Related to Figure 6. A. Disease progression pseudotime trajectory of A-T cerebellar microglia, colored by disease status (red: A-T, blue: control), or pseudotime (healthy to diseased). B. Heatmap of genes that significantly change over pseudotime in microglia, clustered by pseudotemporal expression patterns. Each cluster is annotated with enriched GO terms (FDR<0.05). C. Expression of CD11B, CGAS, TRIM14, TRIM38, and TRIM56 over pseudotime in microglia. D. Heatmap of genes that change over pseudotime in Purkinje neurons, clustered by pseudotemporal expression patterns. Each cluster is annotated with enriched GO terms (FDR<0.05). E. Heatmap of genes that change over pseudotime in granule neurons, clustered by pseudotemporal expression patterns. Each cluster is annotated with enriched GO terms (FDR<0.05). Heatmaps in B, D, E depict centered and scaled expression.

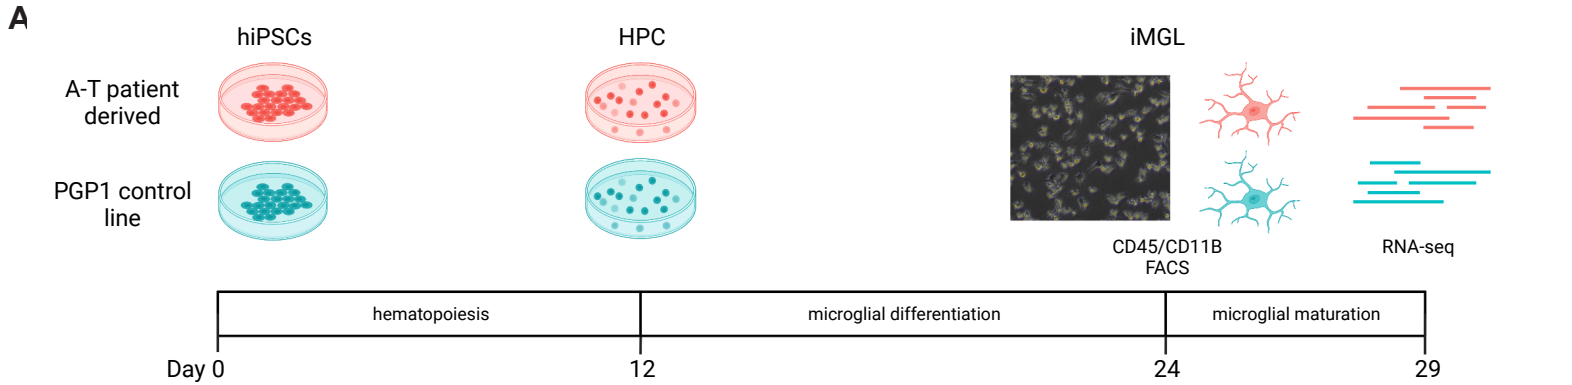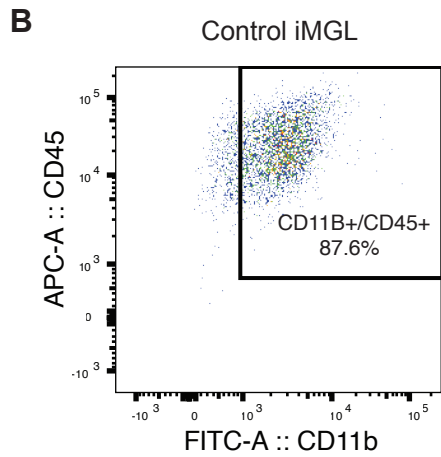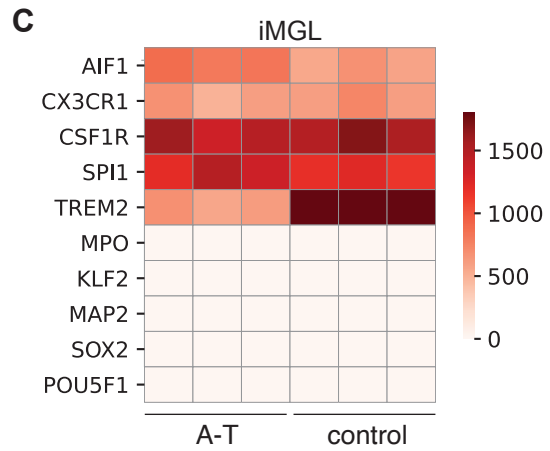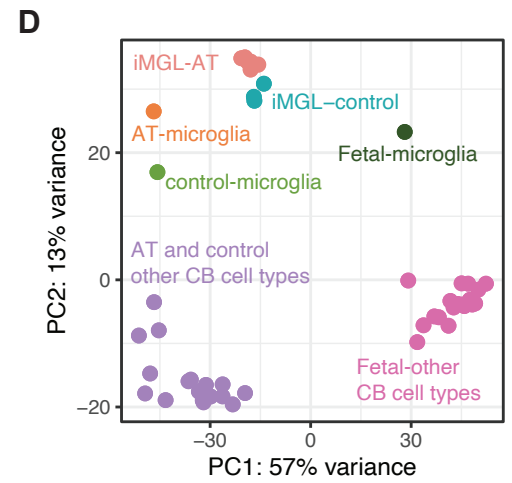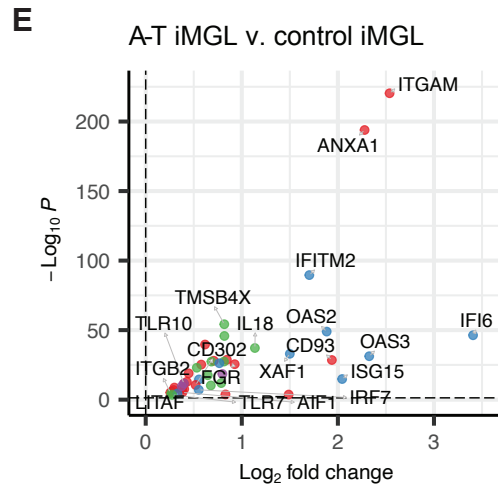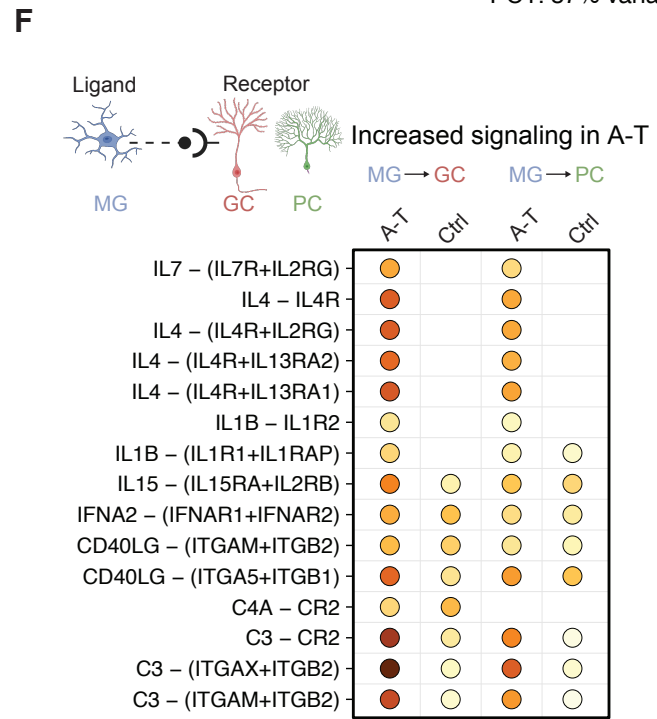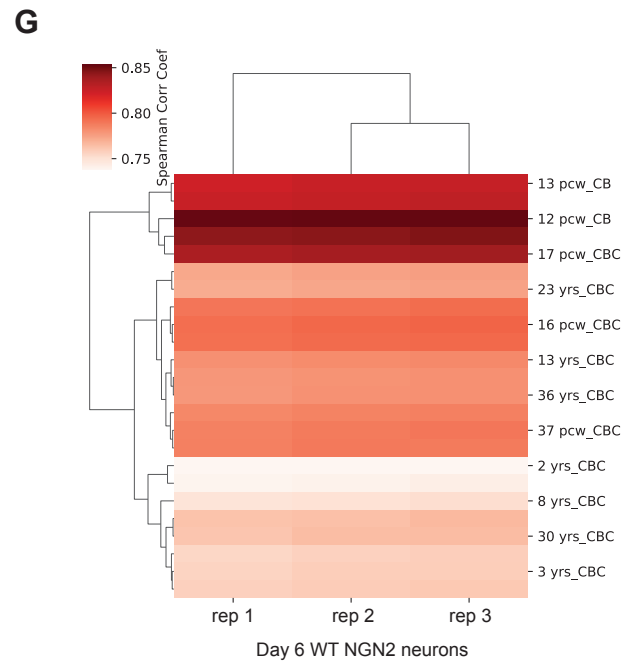



Fig. S6. A-T patient iPSC-derived microglia reveal cell-intrinsic activation of NF-kappaB and type I interferon pathways, Related to Figure 6. A. Schematic for generation of iPSC-derived microglia (iMGL) from human A-T patient and control iPSCs. PGP1, Personal Genome Project 1; HPC: hematopoietic progenitor cells. B. Flow cytometry analysis of CD45 and CD11B co-expression in control iMGLs 24 days post-differentiation. C. Expression of microglia (AIF1, CX3CR1, CSF1R, SPI1, TREM2), myeloid lineage (MPO, KLF2), neuronal (MAP2, SOX2), and iPSC (POU5F1) marker genes in A-T and control iMGLs. Each column represents data from iMGL differentiated in an independent well. D. Principal component analysis plot of A-T and control iMGL (iMGL-AT/control) and adult cerebellar cell type pseudobulk transcriptomic profiles derived from snRNA-seq in this study (AT/control-microglia) and fetal cerebellar cell type pseudobulk transcriptomic profiles derived from snRNA-seq data in Aldinger et al., 2021 (Fetal-microglia). E. Volcano plot for log<sub>2</sub> fold change in gene expression in A-T versus control iMGL. Representative genes associated with cytokine secretion (purple), NIK/NF-kappaB (green), phagocytosis (red), and type I interferon (IFN) (blue) are highlighted. Horizontal dash line represents FDR=0.05. F. Ligand-receptor pairs with increased communication probability from microglia to granule or Purkinje neurons in A-T cerebellum versus control. Dot color represents communication probability (strength of signaling). Dot size represents significance of ligand-receptor pair and pairs with adjusted p-value<0.01 shown. G. Heatmap of Spearman Correlation Coefficients between human control PGP1 (WT) iPSC-derived Ngn2 neurons at day 6 of differentiation transcriptomes and human developing cerebellum (CB) and cerebellar cortex (CBC) transcriptomes from BrainSpan: Atlas of the Developing Human Brain.
